# Supplementary material
Source: PubMed Central journal article supplement (PMC3812435)
Supplement: NIHMS61360-supplement-Supplemental_Data.pdf [file NIHMS61360-supplement-Supplemental_Data.pdf]

## SUPPLEMENTARY DATA

Supplementary Table 1. Experimental, calculated activities and residuals from CoMFA studies

| Compounds                       | Experimental pK <sub>i</sub> |      |           | Calculated pK <sub>i</sub> |      |           | Residual |       |           |
|---------------------------------|------------------------------|------|-----------|----------------------------|------|-----------|----------|-------|-----------|
|                                 | Oat1                         | Oat6 | Selective | Oat1                       | Oat6 | Selective | Oat1     | Oat6  | Selective |
| <b>Training set</b>             |                              |      |           |                            |      |           |          |       |           |
| Acetylsalicylate                | 3.16                         | 3.99 | 0.83      | 3.20                       | 4.13 | 0.59      | -0.04    | -0.14 | 0.24      |
| Adipate                         | 6.39                         | 2.8  | -3.58     | 5.89                       | 2.57 | -2.86     | 0.50     | 0.23  | -0.73     |
| Benzoate                        | 3.6                          | 4.86 | 1.26      | 3.49                       | 4.42 | 1.22      | 0.12     | 0.44  | 0.04      |
| Butyrate                        | 2.46                         | 4.09 | 1.63      | 2.34                       | 4.18 | 1.81      | 0.12     | -0.09 | -0.18     |
| Carbenicillin                   | 2.89                         | 2.87 | -0.02     | 2.81                       | 3.02 | 0.22      | 0.08     | -0.15 | -0.24     |
| Eosiny                          | 7.05                         | 5.36 | -1.69     | 6.88                       | 5.53 | -2.15     | 0.17     | -0.17 | 0.46      |
| Estradioldisulfate              | 3.66                         | 2.14 | -1.52     | 3.61                       | 2.46 | -1.43     | 0.05     | -0.32 | -0.09     |
| Estrone-3-sulfate               | 3.69                         | 4.24 | 0.55      | 3.55                       | 4.15 | 0.25      | 0.14     | 0.09  | 0.30      |
| Fluorescein                     | 5.53                         | 4    | -1.53     | 5.42                       | 4.47 | -1.25     | 0.11     | -0.47 | -0.28     |
| Glutarate                       | 5.17                         | 2.27 | -2.91     | 5.32                       | 2.64 | -2.73     | -0.15    | -0.37 | -0.18     |
| Heptanoate                      | 4.78                         | 5.09 | 0.31      | 5.00                       | 4.90 | -0.12     | -0.22    | 0.19  | 0.43      |
| Hexanoate                       | 4.43                         | 5.04 | 0.62      | 4.84                       | 4.70 | -0.23     | -0.41    | 0.34  | 0.85      |
| Hippurate                       | 4.25                         | 3.51 | -0.75     | 4.54                       | 3.62 | -0.57     | -0.29    | -0.11 | -0.18     |
| Ibuprofen                       | 5.33                         | 5.95 | 0.62      | 5.23                       | 5.44 | 0.36      | 0.10     | 0.51  | 0.26      |
| 3-methylbutyrate                | 2.63                         | 4.49 | 1.86      | 2.60                       | 4.29 | 1.63      | 0.03     | 0.20  | 0.23      |
| 4-Hydroxy-phenyl-pyruvate       | 4.14                         | 4.18 | 0.04      | 4.13                       | 4.16 | 0.26      | 0.01     | 0.02  | -0.22     |
| Methotrexate                    | 3.05                         | 3.22 | 0.18      | 3.14                       | 2.79 | -0.35     | -0.09    | 0.43  | 0.53      |
| Ochratoxin A                    | 5.2                          | 4.31 | -0.89     | 5.16                       | 4.42 | -1.26     | 0.04     | -0.11 | 0.37      |
| Penicillin G                    | 3.48                         | 3.34 | -0.14     | 3.53                       | 3.70 | 0.33      | -0.05    | -0.36 | -0.47     |
| Phenylpyruvate                  | 4.1                          | 4.54 | 0.44      | 4.19                       | 4.67 | 0.62      | -0.09    | -0.13 | -0.18     |
| Probenicid                      | 5.2                          | 5.07 | -0.12     | 5.55                       | 5.08 | -0.59     | -0.35    | -0.01 | 0.47      |
| Propionate                      | 2.09                         | 3.55 | 1.47      | 1.88                       | 3.23 | 2.00      | 0.21     | 0.32  | -0.53     |
| Prostaglandin-E2                | 5.47                         | 4.74 | -0.73     | 5.61                       | 5.16 | -1.03     | -0.14    | -0.42 | 0.30      |
| Pyruvate                        | 1.92                         | 3.57 | 1.64      | 2.48                       | 3.30 | 1.26      | -0.56    | 0.28  | 0.38      |
| P-amino-hippurate               | 5.03                         | 3.35 | -1.68     | 4.81                       | 3.79 | -0.67     | 0.23     | -0.44 | -1.02     |
| Salicylate                      | 3.84                         | 4.36 | 0.52      | 3.66                       | 4.44 | 1.07      | 0.19     | -0.07 | -0.55     |
| Suberate                        | 4.47                         | 2.95 | -1.52     | 4.45                       | 2.77 | -1.65     | 0.02     | 0.18  | 0.13      |
| Ticarcillin                     | 3.28                         | 3.27 | -0.01     | 3.01                       | 3.15 | 0.14      | 0.27     | 0.13  | -0.15     |
| <b>Test set</b>                 |                              |      |           |                            |      |           |          |       |           |
| (S)-2-Hydroxy-3-methyl-butyrate | 1.85                         | 3.5  | 1.65      | 2.50                       | 3.27 | 1.30      | -0.65    | 0.23  | 0.35      |
| (R)-2-Hydroxy-3-methyl-butyrate | 1.85                         | 3.5  | 1.65      | 2.96                       | 4.36 | 1.33      | -1.11    | -0.86 | 0.32      |
| (S)-2-Methyl butyrate           | 3.04                         | 4.39 | 1.35      | 3.94                       | 4.40 | 0.34      | -0.90    | -0.01 | 1.01      |
| (R)-2-Methyl butyrate           | 3.04                         | 4.39 | 1.35      | 3.44                       | 4.28 | 0.84      | -0.40    | 0.11  | 0.51      |
| (S)-3-Hydroxy butyrate          | 2.49                         | 3.72 | 1.23      | 2.92                       | 3.35 | 0.88      | -0.43    | 0.37  | 0.35      |
| (R)-3-Hydroxy butyrate          | 2.49                         | 3.72 | 1.23      | 2.84                       | 3.35 | 1.02      | -0.35    | 0.37  | 0.21      |
| (S)-2-Ethyl hexanoate           | 4.25                         | 5.18 | 0.93      | 5.29                       | 4.62 | -0.66     | -1.04    | 0.56  | 1.59      |
| (R)-2-Ethyl hexanoate           | 4.25                         | 5.18 | 0.93      | 5.28                       | 4.67 | -0.63     | -1.03    | 0.51  | 1.56      |
| (S)-4-Hydroxy phenyl lactate    | 3.65                         | 3.74 | 0.09      | 3.88                       | 4.62 | 0.80      | -0.23    | -0.88 | -0.71     |
| (S)-N-acetyl aspartate          | 3.08                         | 1.56 | -1.52     | 2.80                       | 2.38 | 0.00      | 0.28     | -0.82 | -1.52     |
| Fumarate                        | 3.21                         | 1.5  | -1.71     | 1.61                       | 2.33 | 1.17      | 1.60     | -0.83 | -2.88     |
